# Supplementary material for: The Affect Misattribution in the Interpretation of Ambiguous Stimuli in Terms of Warmth vs. Competence: Behavioral Phenomenon and Its Neural Correlates
Source: MDPI journal article supplement (doi:10.3390/brainsci12081093), 2022-08-17
Supplement: s1 [file s1]

## Supplementary File S2

### A. The time course of the ERPs preceding the response

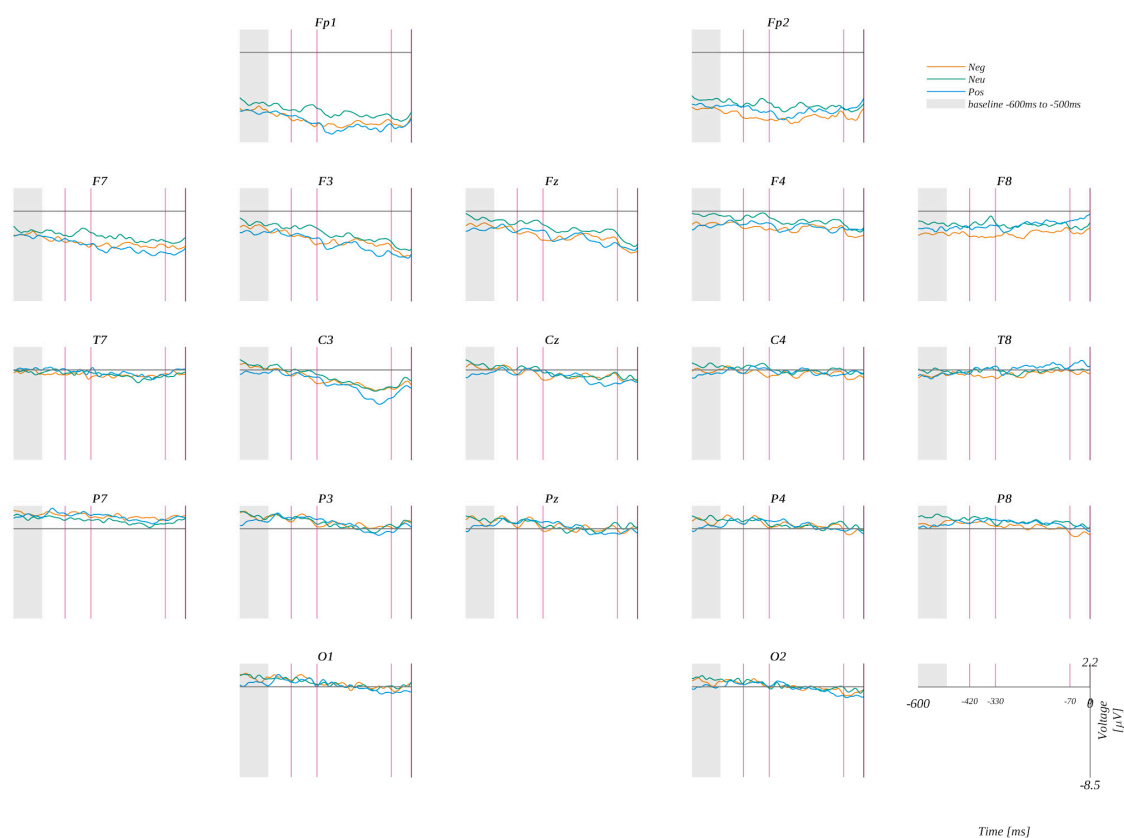

Figure S1. The time course of the ERP preceding the response (at time 0), for each level of valence, averaged across subjects without baseline correction. Gray rectangles indicate the time range selected for baseline corrections in the corresponding analysis.

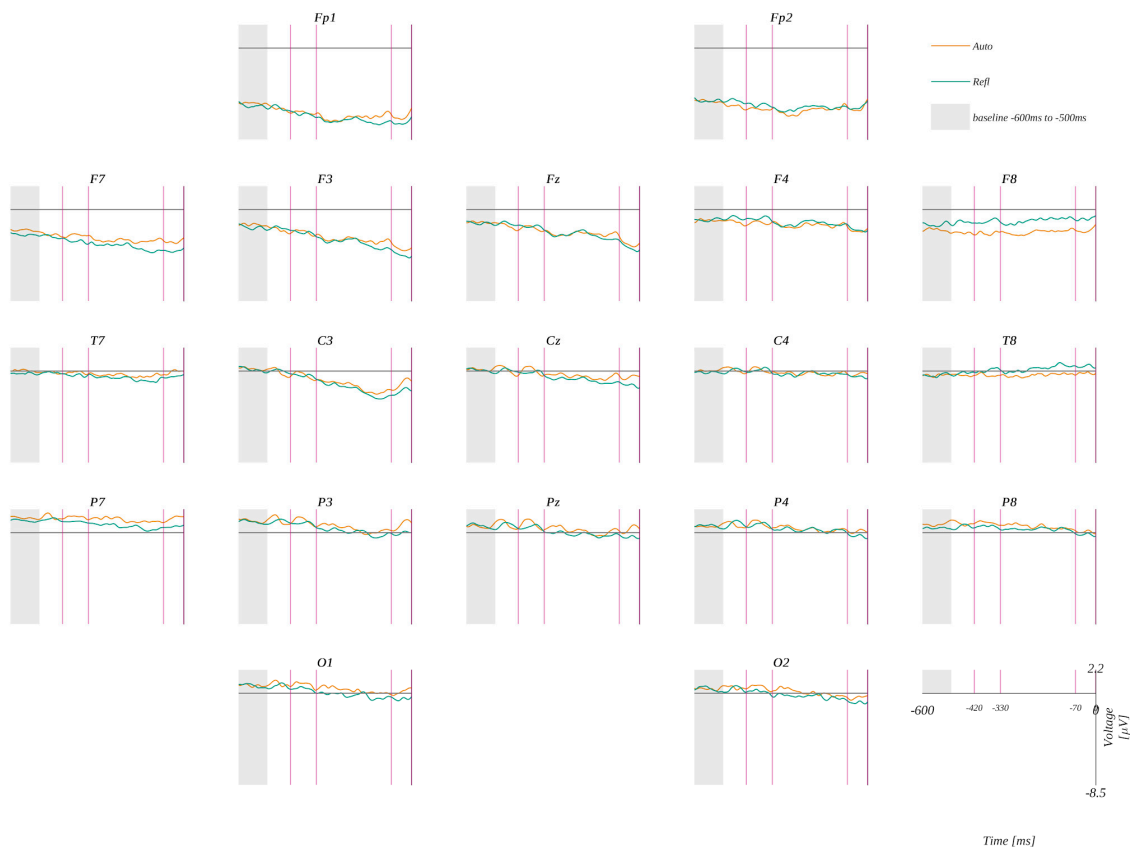

Figure S2. The time course of the ERP preceding the response (at time 0), for each level of origin, averaged across subjects without baseline correction. Gray rectangles indicate the time range selected for baseline corrections in the corresponding analysis.

## B: Word reading and remembering task. ANOVA Table for the first level of analysis.

Time window: 60–145 ms

| Effect             | DFn | DFd | F     | p     |
|--------------------|-----|-----|-------|-------|
| valence            | 2   | 54  | 1.36  | 0.266 |
| origin             | 1   | 27  | 1.95  | 0.174 |
| ROI                | 3   | 81  | 36.79 | 0.000 |
| valence:origin     | 2   | 54  | 0.87  | 0.425 |
| valence:ROI        | 6   | 162 | 0.33  | 0.919 |
| origin:ROI         | 3   | 81  | 1.26  | 0.295 |
| valence:origin:ROI | 6   | 162 | 0.79  | 0.579 |

Time window: 145–235 ms

| Effect             | DFn | DFd | F    | p     |
|--------------------|-----|-----|------|-------|
| valence            | 2   | 54  | 1.65 | 0.202 |
| origin             | 1   | 27  | 1.55 | 0.224 |
| ROI                | 3   | 81  | 6.38 | 0.001 |
| valence:origin     | 2   | 54  | 0.67 | 0.516 |
| valence:ROI        | 6   | 162 | 0.08 | 0.998 |
| origin:ROI         | 3   | 81  | 2.60 | 0.058 |
| valence:origin:ROI | 6   | 162 | 0.56 | 0.759 |

Time window: 235–350 ms

| Effect  | DFn | DFd | F    | p     |
|---------|-----|-----|------|-------|
| valence | 2   | 54  | 0.76 | 0.472 |

|                    |   |     |       |       |
|--------------------|---|-----|-------|-------|
| origin             | 1 | 27  | 2.40  | 0.133 |
| ROI                | 3 | 81  | 14.56 | 0.000 |
| valence:origin     | 2 | 54  | 0.27  | 0.768 |
| valence:ROI        | 6 | 162 | 0.56  | 0.763 |
| origin:ROI         | 3 | 81  | 5.57  | 0.002 |
| valence:origin:ROI | 6 | 162 | 0.27  | 0.949 |

Time window: 350–500 ms

| Effect             | DFn | DFd | F    | p     |
|--------------------|-----|-----|------|-------|
| valence            | 2   | 54  | 2.33 | 0.107 |
| origin             | 1   | 27  | 0.22 | 0.642 |
| ROI                | 3   | 81  | 9.85 | 0.000 |
| valence:origin     | 2   | 54  | 1.22 | 0.303 |
| valence:ROI        | 6   | 162 | 0.37 | 0.897 |
| origin:ROI         | 3   | 81  | 2.17 | 0.098 |
| valence:origin:ROI | 6   | 162 | 0.69 | 0.658 |

### C: Stimulus locked effects for warmth-competence interpretation of octagram. ANOVA Table for first level of analysis.

Time window: 55–135 ms

| Effect                      | DFn | DFd | F     | p     |
|-----------------------------|-----|-----|-------|-------|
| valence                     | 2   | 58  | 0.43  | 0.650 |
| question                    | 1   | 29  | 4.88  | 0.035 |
| origin                      | 1   | 29  | 0.36  | 0.553 |
| ROI                         | 3   | 87  | 18.19 | 0.000 |
| valence:question            | 2   | 58  | 0.33  | 0.722 |
| valence:origin              | 2   | 58  | 0.16  | 0.853 |
| origin:question             | 1   | 29  | 4.62  | 0.040 |
| valence:ROI                 | 6   | 174 | 0.66  | 0.680 |
| question:ROI                | 3   | 87  | 4.95  | 0.003 |
| origin:ROI                  | 3   | 87  | 0.15  | 0.932 |
| valence:origin:question     | 2   | 58  | 0.25  | 0.776 |
| valence:question:ROI        | 6   | 174 | 0.43  | 0.860 |
| valence:origin:ROI          | 6   | 174 | 0.92  | 0.484 |
| origin:question:ROI         | 3   | 87  | 2.54  | 0.062 |
| valence:origin:question:ROI | 6   | 174 | 2.21  | 0.044 |

Time window: 135–175 ms

| Effect   | DFn | DFd | F    | p     |
|----------|-----|-----|------|-------|
| valence  | 2   | 58  | 0.40 | 0.675 |
| question | 1   | 29  | 4.37 | 0.046 |
| origin   | 1   | 29  | 4.75 | 0.038 |
| ROI      | 3   | 87  | 2.49 | 0.066 |

|                             |   |     |      |       |
|-----------------------------|---|-----|------|-------|
| valence:question            | 2 | 58  | 1.55 | 0.221 |
| valence:origin              | 2 | 58  | 1.23 | 0.301 |
| origin:question             | 1 | 29  | 0.07 | 0.793 |
| valence:ROI                 | 6 | 174 | 0.70 | 0.654 |
| question:ROI                | 3 | 87  | 6.23 | 0.001 |
| origin:ROI                  | 3 | 87  | 0.19 | 0.904 |
| valence:origin:question     | 2 | 58  | 0.12 | 0.884 |
| valence:question:ROI        | 6 | 174 | 0.38 | 0.894 |
| valence:origin:ROI          | 6 | 174 | 0.46 | 0.835 |
| origin:question:ROI         | 3 | 87  | 2.42 | 0.072 |
| valence:origin:question:ROI | 6 | 174 | 1.16 | 0.330 |

Time window: 175–315 ms

| Effect                  | DFn | DFd | F     | p     |
|-------------------------|-----|-----|-------|-------|
| valence                 | 2   | 58  | 0.66  | 0.519 |
| question                | 1   | 29  | 6.03  | 0.020 |
| origin                  | 1   | 29  | 6.45  | 0.017 |
| ROI                     | 3   | 87  | 27.85 | 0.000 |
| valence:question        | 2   | 58  | 0.75  | 0.477 |
| valence:origin          | 2   | 58  | 1.88  | 0.162 |
| origin:question         | 1   | 29  | 0.16  | 0.693 |
| valence:ROI             | 6   | 174 | 1.05  | 0.392 |
| question:ROI            | 3   | 87  | 2.89  | 0.040 |
| origin:ROI              | 3   | 87  | 1.42  | 0.243 |
| valence:origin:question | 2   | 58  | 0.13  | 0.883 |

|                             |   |     |      |       |
|-----------------------------|---|-----|------|-------|
| valence:question:ROI        | 6 | 174 | 0.40 | 0.882 |
| valence:origin:ROI          | 6 | 174 | 2.25 | 0.041 |
| origin:question:ROI         | 3 | 87  | 2.04 | 0.114 |
| valence:origin:question:ROI | 6 | 174 | 1.20 | 0.309 |

Time window: 315–500 ms

| Effect                      | DFn | DFd | F     | p     |
|-----------------------------|-----|-----|-------|-------|
| valence                     | 2   | 58  | 0.56  | 0.574 |
| question                    | 1   | 29  | 6.37  | 0.017 |
| origin                      | 1   | 29  | 8.19  | 0.008 |
| ROI                         | 3   | 87  | 44.41 | 0.000 |
| valence:question            | 2   | 58  | 0.18  | 0.833 |
| valence:origin              | 2   | 58  | 0.14  | 0.874 |
| origin:question             | 1   | 29  | 0.35  | 0.560 |
| valence:ROI                 | 6   | 174 | 0.99  | 0.437 |
| question:ROI                | 3   | 87  | 3.68  | 0.015 |
| origin:ROI                  | 3   | 87  | 1.16  | 0.328 |
| valence:origin:question     | 2   | 58  | 0.23  | 0.793 |
| valence:question:ROI        | 6   | 174 | 0.37  | 0.899 |
| valence:origin:ROI          | 6   | 174 | 0.93  | 0.473 |
| origin:question:ROI         | 3   | 87  | 2.56  | 0.060 |
| valence:origin:question:ROI | 6   | 174 | 0.82  | 0.555 |

# D: Response locked effects for warmth-competence interpretation of octagrams. ANOVA Table for first level of analysis.

Time window: -420 ms to -330 ms

| Effect                      | DFn | DFd | F    | p     |
|-----------------------------|-----|-----|------|-------|
| valence                     | 2   | 50  | 2.32 | 0.109 |
| question                    | 1   | 25  | 0.45 | 0.507 |
| origin                      | 1   | 25  | 0.59 | 0.451 |
| ROI                         | 8   | 200 | 5.60 | 0.000 |
| valence:question            | 2   | 50  | 6.48 | 0.003 |
| valence:origin              | 2   | 50  | 1.17 | 0.320 |
| origin:question             | 1   | 25  | 0.93 | 0.343 |
| valence:ROI                 | 16  | 400 | 2.18 | 0.005 |
| question:ROI                | 8   | 200 | 0.60 | 0.777 |
| origin:ROI                  | 8   | 200 | 1.55 | 0.144 |
| valence:origin:question     | 2   | 50  | 0.83 | 0.440 |
| valence:question:ROI        | 16  | 400 | 1.64 | 0.056 |
| valence:origin:ROI          | 16  | 400 | 1.54 | 0.084 |
| origin:question:ROI         | 8   | 200 | 1.14 | 0.337 |
| valence:origin:question:ROI | 16  | 400 | 0.74 | 0.752 |

For the valence:ROI interaction Mauchly's test indicated that the assumption of sphericity had been violated ( $\chi^2(87) = 0.001$   $p < .001$ ), therefore, degrees of freedom were corrected using Greenhouse-Geisser estimates of sphericity ( $\epsilon = .243$ ), and the  $\text{Pr}( > F[\text{GG}] ) = 0.078$ . Therefore this effect is not significant.

Time window: -330 ms to -70 ms

| Effect  | DFn | DFd | F    | p     |
|---------|-----|-----|------|-------|
| valence | 2   | 50  | 0.51 | 0.603 |



|                             |    |     |      |       |
|-----------------------------|----|-----|------|-------|
| question                    | 1  | 25  | 0.69 | 0.413 |
| origin                      | 1  | 25  | 1.03 | 0.319 |
| ROI                         | 8  | 200 | 7.99 | 0.000 |
| valence:question            | 2  | 50  | 2.13 | 0.130 |
| valence:origin              | 2  | 50  | 0.46 | 0.631 |
| origin:question             | 1  | 25  | 0.20 | 0.659 |
| valence:ROI                 | 16 | 400 | 0.80 | 0.681 |
| question:ROI                | 8  | 200 | 0.67 | 0.716 |
| origin:ROI                  | 8  | 200 | 0.65 | 0.739 |
| valence:origin:question     | 2  | 50  | 0.88 | 0.421 |
| valence:question:ROI        | 16 | 400 | 2.16 | 0.006 |
| valence:origin:ROI          | 16 | 400 | 0.57 | 0.905 |
| origin:question:ROI         | 8  | 200 | 0.48 | 0.869 |
| valence:origin:question:ROI | 16 | 400 | 0.38 | 0.987 |

Time window: -70 ms to 0 ms

| Effect           | DFn | DFd | F     | p     |
|------------------|-----|-----|-------|-------|
| valence          | 2   | 50  | 0.22  | 0.801 |
| question         | 1   | 25  | 1.68  | 0.207 |
| origin           | 1   | 25  | 1.68  | 0.207 |
| ROI              | 8   | 200 | 10.58 | 0.000 |
| valence:question | 2   | 50  | 1.06  | 0.353 |
| valence:origin   | 2   | 50  | 0.52  | 0.600 |
| origin:question  | 1   | 25  | 0.49  | 0.489 |
| valence:ROI      | 16  | 400 | 1.28  | 0.208 |
| question:ROI     | 8   | 200 | 0.77  | 0.632 |

---

|                             |    |     |      |       |
|-----------------------------|----|-----|------|-------|
| origin:ROI                  | 8  | 200 | 1.25 | 0.273 |
| valence:origin:question     | 2  | 50  | 3.48 | 0.039 |
| valence:question:ROI        | 16 | 400 | 0.69 | 0.810 |
| valence:origin:ROI          | 16 | 400 | 0.71 | 0.787 |
| origin:question:ROI         | 8  | 200 | 0.94 | 0.483 |
| valence:origin:question:ROI | 16 | 400 | 0.61 | 0.881 |
